# Supplementary material for: What is the best bonding model of the (σ-H-BR) species bound to a transition metal? Bonding analysis in complexes [(H)2Cl(PMe3)2M(σ-H-BR)] (M = Fe, Ru, Os)
Source: Royal Society of Chemistry journal article supplement (doi:10.1039/c2dt11921h), 2012-01-01
Supplement: c2dt11921h.pdf [file c2dt11921h.pdf]

**What is the best bonding model of the ( $\sigma$ -H-BR) Species bound to a transition metal?:  
Bonding analysis in complexes  $[(H)_2Cl(PMe_3)_2M(\sigma\text{-H-BR})]$  (M = Fe, Ru, Os)**

Krishna K. Pandey

*School of Chemical Sciences, Devi Ahilya University Indore, Khandwa Road Campus, Indore  
452017, India*

**E-mail:** [kkpandey.schem@dauniv.ac.in](mailto:kkpandey.schem@dauniv.ac.in)

**Supporting Information**

Cartesian coordinates of terminal neutral complexes of iron, ruthenium and osmium  $[(H)_2Cl(PMe_3)_2M(\sigma\text{-H-BR})]$  (M = Fe, **I**, R = OMe, **II**, R = NMe<sub>2</sub>, **III**, R = Ph; M = Ru, **IV**, R = OMe, **V**, R = NMe<sub>2</sub>, **VI**, R = Ph; M = Os, **VII**, R = OMe, **VIII**, R = NMe<sub>2</sub>, **IX**, R = Ph)

**$[(H)_2Cl(PMe_3)_2Fe(HBOMe)]$  (**I**)**

|    |           |           |           |
|----|-----------|-----------|-----------|
| B  | -1.796598 | 0.412352  | 0.000000  |
| H  | -0.982060 | 1.415364  | 0.000000  |
| O  | -3.143526 | 0.527238  | 0.000000  |
| C  | -3.769162 | 1.821967  | 0.000000  |
| H  | -3.485067 | 2.391816  | 0.894772  |
| H  | -3.485067 | 2.391816  | -0.894772 |
| H  | -4.851989 | 1.661122  | 0.000000  |
| Fe | -0.058034 | -0.032264 | 0.000000  |
| Cl | 1.893764  | 1.245229  | 0.000000  |
| P  | 0.318240  | -0.303639 | -2.159284 |
| P  | 0.318240  | -0.303639 | 2.159284  |
| C  | -0.812467 | -1.435971 | -3.085994 |
| C  | -0.812467 | -1.435971 | 3.085994  |
| C  | 0.303806  | 1.205827  | -3.226450 |
| C  | 0.303806  | 1.205827  | 3.226450  |
| C  | 1.964519  | -1.025135 | -2.568754 |
| C  | 1.964519  | -1.025135 | 2.568754  |
| H  | 0.612440  | -1.379372 | 0.000000  |
| H  | -1.356394 | -0.902150 | 0.000000  |
| H  | -1.839013 | -1.045628 | -3.055924 |
| H  | -0.494935 | -1.538859 | -4.133621 |
| H  | -0.805385 | -2.424879 | -2.607841 |
| H  | -0.494935 | -1.538859 | 4.133621  |
| H  | -1.839013 | -1.045628 | 3.055924  |
| H  | -0.805385 | -2.424879 | 2.607841  |
| H  | -0.702109 | 1.647796  | -3.226671 |

|   |           |           |           |
|---|-----------|-----------|-----------|
| H | 1.007437  | 1.932417  | -2.798556 |
| H | 0.597354  | 0.967525  | -4.259213 |
| H | 1.007437  | 1.932417  | 2.798556  |
| H | -0.702109 | 1.647796  | 3.226671  |
| H | 0.597354  | 0.967525  | 4.259213  |
| H | 2.739562  | -0.402324 | 2.104384  |
| H | 2.113321  | -1.066606 | 3.657360  |
| H | 2.028811  | -2.037510 | 2.148686  |
| H | 2.113321  | -1.066606 | -3.657360 |
| H | 2.739562  | -0.402324 | -2.104384 |
| H | 2.028811  | -2.037510 | -2.148686 |

**[(H)<sub>2</sub>Cl(PMe<sub>3</sub>)<sub>2</sub>Fe(HBNMe<sub>2</sub>)] (II)**

|    |           |           |           |
|----|-----------|-----------|-----------|
| B  | 1.690051  | 0.344560  | 0.000000  |
| N  | 3.088645  | 0.460775  | 0.000000  |
| C  | 3.760766  | 1.755497  | 0.000000  |
| C  | 3.988053  | -0.686265 | 0.000000  |
| H  | 3.018607  | 2.560960  | 0.000000  |
| H  | 0.927761  | 1.366679  | 0.000000  |
| H  | 4.400192  | 1.869380  | 0.891449  |
| H  | 4.400192  | 1.869380  | -0.891449 |
| H  | 4.638283  | -0.680316 | 0.891026  |
| H  | 4.638283  | -0.680316 | -0.891026 |
| H  | 3.409221  | -1.616266 | 0.000000  |
| Fe | -0.094231 | -0.048123 | 0.000000  |
| Cl | -2.015413 | 1.271616  | 0.000000  |
| P  | -0.449577 | -0.278291 | -2.165095 |
| P  | -0.449577 | -0.278291 | 2.165095  |
| C  | 0.666934  | -1.413287 | 3.110472  |
| C  | 0.666934  | -1.413287 | -3.110472 |
| C  | -0.392280 | 1.247548  | 3.208626  |
| C  | -0.392280 | 1.247548  | -3.208626 |
| C  | -2.104119 | -0.961182 | 2.610248  |
| C  | -2.104119 | -0.961182 | -2.610248 |
| H  | -0.816334 | -1.365565 | 0.000000  |
| H  | 1.203073  | -0.936942 | 0.000000  |
| H  | 1.698688  | -1.037836 | 3.068196  |
| H  | 0.354792  | -1.490420 | 4.162049  |
| H  | 0.641134  | -2.411821 | 2.653056  |
| H  | 0.354792  | -1.490420 | -4.162049 |
| H  | 1.698688  | -1.037836 | -3.068196 |
| H  | 0.641134  | -2.411821 | -2.653056 |
| H  | 0.620784  | 1.672099  | 3.181983  |
| H  | -1.091152 | 1.978802  | 2.780922  |
| H  | -0.670725 | 1.032073  | 4.250637  |
| H  | -1.091152 | 1.978802  | -2.780922 |
| H  | 0.620784  | 1.672099  | -3.181983 |
| H  | -0.670725 | 1.032073  | -4.250637 |
| H  | -2.872836 | -0.331975 | -2.143964 |
| H  | -2.240909 | -0.981121 | -3.701017 |

|   |           |           |           |
|---|-----------|-----------|-----------|
| H | -2.193336 | -1.979027 | -2.208316 |
| H | -2.240909 | -0.981121 | 3.701017  |
| H | -2.872836 | -0.331975 | 2.143964  |
| H | -2.193336 | -1.979027 | 2.208316  |

**[(H)<sub>2</sub>Cl(PMe<sub>3</sub>)<sub>2</sub>Fe(HBPh)] (III)**

|    |           |           |           |
|----|-----------|-----------|-----------|
| B  | 1.309220  | -0.181320 | 0.000000  |
| H  | 0.646015  | -1.279066 | 0.000000  |
| C  | 2.845308  | -0.142119 | 0.000000  |
| C  | 3.560576  | 1.075089  | 0.000000  |
| C  | 3.591311  | -1.341506 | 0.000000  |
| C  | 4.953986  | 1.094688  | 0.000000  |
| C  | 4.984823  | -1.325460 | 0.000000  |
| C  | 5.669635  | -0.106600 | 0.000000  |
| H  | 3.009480  | 2.016646  | 0.000000  |
| H  | 3.062826  | -2.295711 | 0.000000  |
| H  | 5.486468  | 2.045788  | 0.000000  |
| H  | 5.540672  | -2.263053 | 0.000000  |
| H  | 6.759569  | -0.092796 | 0.000000  |
| Fe | -0.483761 | 0.000871  | 0.000000  |
| Cl | -2.243307 | -1.534257 | 0.000000  |
| P  | -0.911519 | 0.216288  | -2.159802 |
| P  | -0.911519 | 0.216288  | 2.159802  |
| C  | 0.047496  | 1.497138  | -3.083742 |
| C  | 0.047496  | 1.497138  | 3.083742  |
| C  | -0.673427 | -1.281755 | -3.211639 |
| C  | -0.673427 | -1.281755 | 3.211639  |
| C  | -2.644075 | 0.694344  | -2.565370 |
| C  | -2.644075 | 0.694344  | 2.565370  |
| H  | -1.358060 | 1.224479  | 0.000000  |
| H  | 0.675255  | 1.041536  | 0.000000  |
| H  | 1.117759  | 1.251264  | -3.055353 |
| H  | -0.283485 | 1.554721  | -4.130695 |
| H  | -0.098420 | 2.475332  | -2.605496 |
| H  | -0.283485 | 1.554721  | 4.130695  |
| H  | 1.117759  | 1.251264  | 3.055353  |
| H  | -0.098420 | 2.475332  | 2.605496  |
| H  | 0.386163  | -1.571166 | -3.200585 |
| H  | -1.267954 | -2.099194 | -2.782536 |
| H  | -0.991332 | -1.093519 | -4.247481 |
| H  | -1.267954 | -2.099194 | 2.782536  |
| H  | 0.386163  | -1.571166 | 3.200585  |
| H  | -0.991332 | -1.093519 | 4.247481  |
| H  | -3.322666 | -0.029972 | 2.097704  |
| H  | -2.797695 | 0.709432  | 3.653903  |
| H  | -2.850488 | 1.689623  | 2.150363  |
| H  | -2.797695 | 0.709432  | -3.653903 |
| H  | -3.322666 | -0.029972 | -2.097704 |
| H  | -2.850488 | 1.689623  | -2.150363 |

**[(H)<sub>2</sub>Cl(PMe<sub>3</sub>)<sub>2</sub>Ru(HBOMe)] (IV)**

|    |           |           |           |
|----|-----------|-----------|-----------|
| B  | -1.857998 | 0.398509  | 0.000000  |
| H  | -1.159773 | 1.490535  | 0.000000  |
| O  | -3.205441 | 0.353695  | 0.000000  |
| C  | -3.979466 | 1.566894  | 0.000000  |
| H  | -3.764049 | 2.166021  | 0.894309  |
| H  | -3.764049 | 2.166021  | -0.894309 |
| H  | -5.035879 | 1.280000  | 0.000000  |
| Ru | -0.021245 | -0.100191 | 0.000000  |
| Cl | 2.117141  | 1.139104  | 0.000000  |
| P  | 0.302727  | -0.246245 | -2.320685 |
| P  | 0.302727  | -0.246245 | 2.320685  |
| C  | -0.903258 | -1.204643 | -3.341314 |
| C  | -0.903258 | -1.204643 | 3.341314  |
| C  | 0.401751  | 1.357562  | -3.229518 |
| C  | 0.401751  | 1.357562  | 3.229518  |
| C  | 1.900293  | -1.033219 | -2.789946 |
| C  | 1.900293  | -1.033219 | 2.789946  |
| H  | 0.700435  | -1.532834 | 0.000000  |
| H  | -1.263838 | -1.150174 | 0.000000  |
| H  | -1.900903 | -0.751068 | -3.262835 |
| H  | -0.597077 | -1.227228 | -4.397117 |
| H  | -0.962509 | -2.232230 | -2.958145 |
| H  | -0.597077 | -1.227228 | 4.397117  |
| H  | -1.900903 | -0.751068 | 3.262835  |
| H  | -0.962509 | -2.232230 | 2.958145  |
| H  | -0.564260 | 1.877613  | -3.169874 |
| H  | 1.163848  | 1.976513  | -2.736933 |
| H  | 0.669925  | 1.203628  | -4.284797 |
| H  | 1.163848  | 1.976513  | 2.736933  |
| H  | -0.564260 | 1.877613  | 3.169874  |
| H  | 0.669925  | 1.203628  | 4.284797  |
| H  | 2.707576  | -0.497234 | 2.273261  |
| H  | 2.053006  | -0.993179 | 3.878197  |
| H  | 1.902176  | -2.078726 | 2.454203  |
| H  | 2.053006  | -0.993179 | -3.878197 |
| H  | 2.707576  | -0.497234 | -2.273261 |
| H  | 1.902176  | -2.078726 | -2.454203 |

**[(H)<sub>2</sub>Cl(PMe<sub>3</sub>)<sub>2</sub>Ru(HBNMe<sub>2</sub>)] (V)**

|   |          |           |           |
|---|----------|-----------|-----------|
| B | 1.747011 | 0.392580  | 0.000000  |
| N | 3.147551 | 0.347792  | 0.000000  |
| C | 3.960291 | 1.560537  | 0.000000  |
| C | 3.921350 | -0.888417 | 0.000000  |
| H | 3.312138 | 2.442917  | 0.000000  |
| H | 1.109504 | 1.493191  | 0.000000  |
| H | 4.608769 | 1.602376  | 0.891088  |
| H | 4.608769 | 1.602376  | -0.891088 |

|    |           |           |           |
|----|-----------|-----------|-----------|
| H  | 4.568885  | -0.949320 | 0.891067  |
| H  | 4.568885  | -0.949320 | -0.891067 |
| H  | 3.245649  | -1.750183 | 0.000000  |
| Ru | -0.123234 | -0.102997 | 0.000000  |
| Cl | -2.251981 | 1.137498  | 0.000000  |
| P  | -0.412999 | -0.218981 | -2.322168 |
| P  | -0.412999 | -0.218981 | 2.322168  |
| C  | 0.789797  | -1.180199 | 3.347678  |
| C  | 0.789797  | -1.180199 | -3.347678 |
| C  | -0.466939 | 1.398515  | -3.212816 |
| C  | -0.466939 | 1.398515  | 3.212816  |
| C  | -2.016643 | -0.970537 | -2.832429 |
| C  | -2.016643 | -0.970537 | 2.832429  |
| H  | -0.834145 | -1.531396 | 0.000000  |
| H  | 1.115865  | -1.151269 | 0.000000  |
| H  | 1.793111  | -0.743745 | 3.246527  |
| H  | 0.499081  | -1.176107 | 4.408157  |
| H  | 0.824999  | -2.216805 | 2.985990  |
| H  | 0.499081  | -1.176107 | -4.408157 |
| H  | 1.793111  | -0.743745 | -3.246527 |
| H  | 0.824999  | -2.216805 | -2.985990 |
| H  | 0.503898  | 1.904258  | 3.117675  |
| H  | -1.234368 | 2.021534  | 2.733676  |
| H  | -0.706944 | 1.263723  | 4.277526  |
| H  | -1.234368 | 2.021534  | -2.733676 |
| H  | 0.503898  | 1.904258  | -3.117675 |
| H  | -0.706944 | 1.263723  | -4.277526 |
| H  | -2.822736 | -0.429893 | -2.318825 |
| H  | -2.152414 | -0.909908 | -3.921953 |
| H  | -2.042483 | -2.021437 | -2.514734 |
| H  | -2.152414 | -0.909908 | 3.921953  |
| H  | -2.822736 | -0.429893 | 2.318825  |
| H  | -2.042483 | -2.021437 | 2.514734  |

**[(H)<sub>2</sub>Cl(PMe<sub>3</sub>)<sub>2</sub>Ru(HBPh)] (VI)**

|    |           |           |          |
|----|-----------|-----------|----------|
| B  | 1.359775  | -0.262431 | 0.000000 |
| H  | 0.761800  | -1.401473 | 0.000000 |
| C  | 2.891399  | -0.120376 | 0.000000 |
| C  | 3.529912  | 1.137942  | 0.000000 |
| C  | 3.708651  | -1.271597 | 0.000000 |
| C  | 4.919674  | 1.242385  | 0.000000 |
| C  | 5.099033  | -1.171392 | 0.000000 |
| C  | 5.707463  | 0.086907  | 0.000000 |
| H  | 2.919670  | 2.042128  | 0.000000 |
| H  | 3.238434  | -2.255479 | 0.000000 |
| H  | 5.393527  | 2.224022  | 0.000000 |
| H  | 5.711024  | -2.073310 | 0.000000 |
| H  | 6.794602  | 0.167492  | 0.000000 |
| Ru | -0.520265 | 0.048314  | 0.000000 |

|    |           |           |           |
|----|-----------|-----------|-----------|
| Cl | -2.526702 | -1.398411 | 0.000000  |
| P  | -0.875805 | 0.155661  | -2.323458 |
| P  | -0.875805 | 0.155661  | 2.323458  |
| C  | 0.207252  | 1.252175  | -3.339720 |
| C  | 0.207252  | 1.252175  | 3.339720  |
| C  | -0.773470 | -1.452742 | -3.219426 |
| C  | -0.773470 | -1.452742 | 3.219426  |
| C  | -2.557017 | 0.744263  | -2.788077 |
| C  | -2.557017 | 0.744263  | 2.788077  |
| H  | -1.393063 | 1.395831  | 0.000000  |
| H  | 0.610257  | 1.212567  | 0.000000  |
| H  | 1.251609  | 0.921662  | -3.256562 |
| H  | -0.096779 | 1.234853  | -4.396261 |
| H  | 0.137769  | 2.280288  | -2.959516 |
| H  | -0.096779 | 1.234853  | 4.396261  |
| H  | 1.251609  | 0.921662  | 3.256562  |
| H  | 0.137769  | 2.280288  | 2.959516  |
| H  | 0.250709  | -1.844526 | -3.154000 |
| H  | -1.453342 | -2.159281 | -2.724557 |
| H  | -1.056368 | -1.339199 | -4.275916 |
| H  | -1.453342 | -2.159281 | 2.724557  |
| H  | 0.250709  | -1.844526 | 3.154000  |
| H  | -1.056368 | -1.339199 | 4.275916  |
| H  | -3.294344 | 0.115701  | 2.271488  |
| H  | -2.702934 | 0.685556  | 3.876367  |
| H  | -2.683698 | 1.782445  | 2.453504  |
| H  | -2.702934 | 0.685556  | -3.876367 |
| H  | -3.294344 | 0.115701  | -2.271488 |
| H  | -2.683698 | 1.782445  | -2.453504 |

**[(H)<sub>2</sub>Cl(PMe<sub>3</sub>)<sub>2</sub>Os(HBOMe)] (VII)**

|    |           |           |           |
|----|-----------|-----------|-----------|
| B  | -1.830260 | 0.413532  | 0.000000  |
| H  | -1.018117 | 1.464886  | 0.000000  |
| O  | -3.173312 | 0.456664  | 0.000000  |
| C  | -3.886243 | 1.706299  | 0.000000  |
| H  | -3.642082 | 2.293387  | 0.894801  |
| H  | -3.642082 | 2.293387  | -0.894801 |
| H  | -4.955262 | 1.471475  | 0.000000  |
| Os | 0.007401  | -0.149007 | 0.000000  |
| Cl | 2.108890  | 1.194020  | 0.000000  |
| P  | 0.284817  | -0.262927 | -2.335341 |
| P  | 0.284817  | -0.262927 | 2.335341  |
| C  | -0.908319 | -1.264276 | -3.325826 |
| C  | -0.908319 | -1.264276 | 3.325826  |
| C  | 0.286951  | 1.344792  | -3.242406 |
| C  | 0.286951  | 1.344792  | 3.242406  |
| C  | 1.903394  | -0.976017 | -2.848080 |
| C  | 1.903394  | -0.976017 | 2.848080  |
| H  | 0.875064  | -1.537972 | 0.000000  |

|   |           |           |           |
|---|-----------|-----------|-----------|
| H | -1.015864 | -1.411202 | 0.000000  |
| H | -1.921083 | -0.854796 | -3.208809 |
| H | -0.635676 | -1.262480 | -4.391049 |
| H | -0.910425 | -2.296776 | -2.951527 |
| H | -0.635676 | -1.262480 | 4.391049  |
| H | -1.921083 | -0.854796 | 3.208809  |
| H | -0.910425 | -2.296776 | 2.951527  |
| H | -0.700536 | 1.818925  | -3.155089 |
| H | 1.033262  | 1.999703  | -2.772126 |
| H | 0.531040  | 1.204731  | -4.305284 |
| H | 1.033262  | 1.999703  | 2.772126  |
| H | -0.700536 | 1.818925  | 3.155089  |
| H | 0.531040  | 1.204731  | 4.305284  |
| H | 2.699657  | -0.402663 | 2.354508  |
| H | 2.026246  | -0.932538 | 3.939828  |
| H | 1.962328  | -2.019200 | 2.510231  |
| H | 2.026246  | -0.932538 | -3.939828 |
| H | 2.699657  | -0.402663 | -2.354508 |
| H | 1.962328  | -2.019200 | -2.510231 |

**[(H)<sub>2</sub>Cl(PMe<sub>3</sub>)<sub>2</sub>Os(HBNMe<sub>2</sub>)] (VIII)**

|    |           |           |           |
|----|-----------|-----------|-----------|
| B  | 1.689801  | 0.459013  | 0.000000  |
| N  | 3.086764  | 0.537380  | 0.000000  |
| C  | 3.805576  | 1.806452  | 0.000000  |
| C  | 3.940454  | -0.645327 | 0.000000  |
| H  | 0.908653  | 1.494284  | 0.000000  |
| H  | 3.094444  | 2.638745  | 0.000000  |
| H  | 4.448964  | 1.897394  | 0.891200  |
| H  | 4.448964  | 1.897394  | -0.891200 |
| H  | 4.590445  | -0.663763 | 0.891386  |
| H  | 4.590445  | -0.663763 | -0.891386 |
| H  | 3.320067  | -1.547373 | 0.000000  |
| Os | -0.159288 | -0.145638 | 0.000000  |
| Cl | -2.236257 | 1.220064  | 0.000000  |
| P  | -0.394313 | -0.259726 | 2.335856  |
| P  | -0.394313 | -0.259726 | -2.335856 |
| C  | 0.684765  | -1.431555 | 3.273304  |
| C  | 0.684765  | -1.431555 | -3.273304 |
| C  | -0.164396 | 1.310275  | 3.282895  |
| C  | -0.164396 | 1.310275  | -3.282895 |
| C  | -2.071998 | -0.780551 | 2.895889  |
| C  | -2.071998 | -0.780551 | -2.895889 |
| H  | -0.997039 | -1.549095 | 0.000000  |
| H  | 0.882227  | -1.396974 | 0.000000  |
| H  | 1.740256  | -1.189903 | 3.088556  |
| H  | 0.483441  | -1.381734 | 4.353455  |
| H  | 0.495703  | -2.452500 | 2.914904  |
| H  | 0.483441  | -1.381734 | -4.353455 |
| H  | 1.740256  | -1.189903 | -3.088556 |

|   |           |           |           |
|---|-----------|-----------|-----------|
| H | 0.495703  | -2.452500 | -2.914904 |
| H | 0.824061  | 1.735952  | 3.062247  |
| H | -0.932305 | 2.024481  | 2.954544  |
| H | -0.258731 | 1.141276  | 4.365404  |
| H | -0.932305 | 2.024481  | -2.954544 |
| H | 0.824061  | 1.735952  | -3.062247 |
| H | -0.258731 | 1.141276  | -4.365404 |
| H | -2.815003 | -0.184595 | -2.349474 |
| H | -2.190241 | -0.635319 | -3.979240 |
| H | -2.220534 | -1.840492 | -2.649258 |
| H | -2.190241 | -0.635319 | 3.979240  |
| H | -2.815003 | -0.184595 | 2.349474  |
| H | -2.220534 | -1.840492 | 2.649258  |

**[(H)<sub>2</sub>Cl(PMe<sub>3</sub>)<sub>2</sub>Os(HBPh)] (IX)**

|    |           |           |           |
|----|-----------|-----------|-----------|
| B  | 1.333990  | -0.253743 | 0.000000  |
| H  | 0.665933  | -1.378143 | 0.000000  |
| C  | 2.867624  | -0.154493 | 0.000000  |
| C  | 3.524736  | 1.094226  | 0.000000  |
| C  | 3.666220  | -1.318196 | 0.000000  |
| C  | 4.916116  | 1.176550  | 0.000000  |
| C  | 5.058076  | -1.239073 | 0.000000  |
| C  | 5.686190  | 0.009357  | 0.000000  |
| H  | 2.927519  | 2.006622  | 0.000000  |
| H  | 3.182814  | -2.295440 | 0.000000  |
| H  | 5.404850  | 2.150895  | 0.000000  |
| H  | 5.655903  | -2.150453 | 0.000000  |
| H  | 6.774424  | 0.073035  | 0.000000  |
| Os | -0.552113 | 0.096558  | 0.000000  |
| Cl | -2.484124 | -1.477922 | 0.000000  |
| P  | -0.859405 | 0.172530  | -2.339186 |
| P  | -0.859405 | 0.172530  | 2.339186  |
| C  | 0.189284  | 1.325155  | -3.325188 |
| C  | 0.189284  | 1.325155  | 3.325188  |
| C  | -0.642995 | -1.424307 | -3.234735 |
| C  | -0.642995 | -1.424307 | 3.234735  |
| C  | -2.560408 | 0.663718  | -2.842007 |
| C  | -2.560408 | 0.663718  | 2.842007  |
| H  | -1.553979 | 1.393155  | 0.000000  |
| H  | 0.350066  | 1.447174  | 0.000000  |
| H  | 1.246528  | 1.050781  | -3.208305 |
| H  | -0.081445 | 1.288305  | -4.390238 |
| H  | 0.052941  | 2.348378  | -2.950007 |
| H  | -0.081445 | 1.288305  | 4.390238  |
| H  | 1.246528  | 1.050781  | 3.208305  |
| H  | 0.052941  | 2.348378  | 2.950007  |
| H  | 0.400227  | -1.756385 | -3.142491 |
| H  | -1.294379 | -2.172193 | -2.762244 |
| H  | -0.902174 | -1.323369 | -4.298426 |



|   |           |           |           |
|---|-----------|-----------|-----------|
| H | -1.294379 | -2.172193 | 2.762244  |
| H | 0.400227  | -1.756385 | 3.142491  |
| H | -0.902174 | -1.323369 | 4.298426  |
| H | -3.271966 | -0.010525 | 2.346982  |
| H | -2.678454 | 0.604245  | 3.933413  |
| H | -2.756320 | 1.689929  | 2.504021  |
| H | -2.678454 | 0.604245  | -3.933413 |
| H | -3.271966 | -0.010525 | -2.346982 |
| H | -2.756320 | 1.689929  | -2.504021 |
